# Supplementary material for: Portable visual quantitative detection of aflatoxin B1using a target-responsive hydrogel and a distance-readout microfluidic chip
Source: Royal Society of Chemistry journal article supplement (doi:10.1039/c6lc00474a), 2016-01-01
Supplement: c6lc00474a1.pdf [file c6lc00474a1.pdf]

## Supporting Information

# Portable Visual Quantitative Detection of Aflatoxin B<sub>1</sub> Using a Target-Responsive Hydrogel and Distance- Readout Microfluidic Chip

Yanli Ma, Yu Mao, Di Huang, Zhe He, Jinmao Yan, Tian Tian, Yuanzhi Shi, Yanling Song,  
Xingrui Li, Zhi Zhu\*, Leiji Zhou and Chaoyong James Yang

MOE Key Laboratory of Spectrochemical Analysis & Instrumentation, Collaborative Innovation  
Center of Chemistry for Energy Materials, Key Laboratory for Chemical Biology of Fujian  
Province, State Key Laboratory of Physical Chemistry of Solid Surfaces, College of Chemistry  
and Chemical Engineering, Xiamen University, Xiamen 361005, China.

E-mail: cyyang@xmu.edu.cn, ljzhou@xmu.edu.cn, zhuzhi@xmu.edu.cn

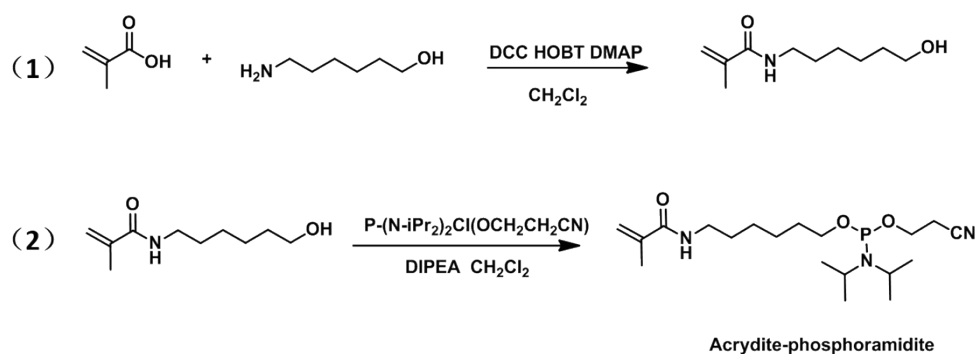

Fig. S1 Synthetic route of acrydite phosphoramidite.

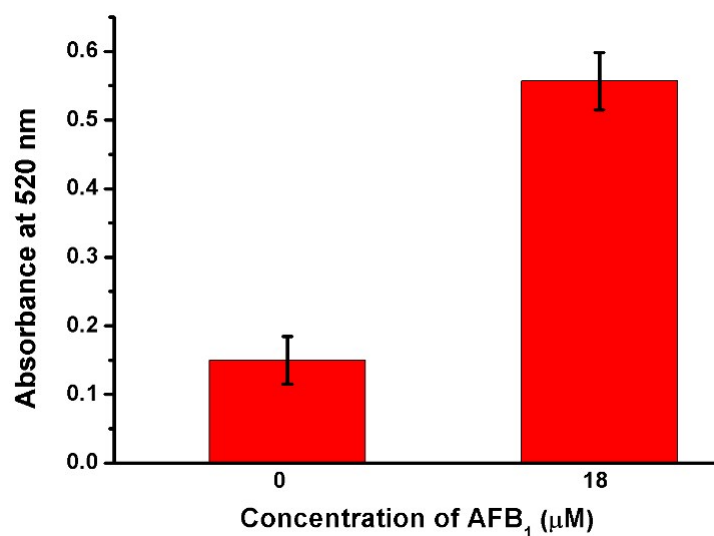

Fig. S2 Absorbance of supernatant at 520 nm for 0 μM and 18 μM AFB<sub>1</sub>.

3'- CAACCCGTGCA -5' Strnad B -11 base  
 3'- CAACCCGTGCAC -5' Strnad B -12 base  
 3'- CAACCCGTGCACA -5' Strnad B -13 base  
 5'- GTTGGGCACGTGT TGTCTCTCTGTGTCTCGTGCCCTTCGCTAGGCCCA -3' linker

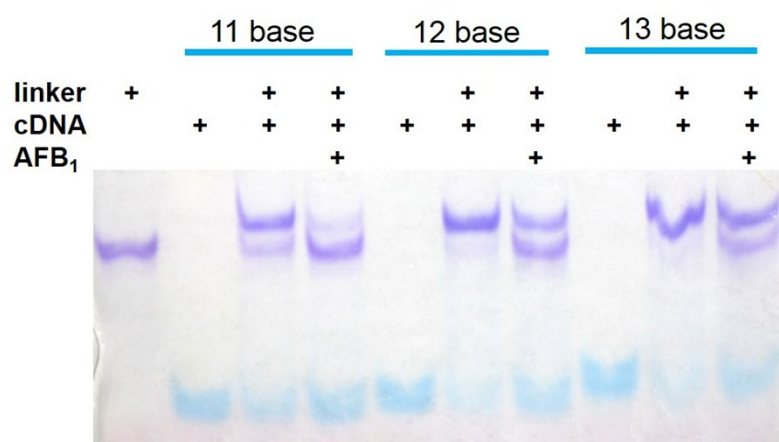

Fig. S3 Optimization of hybridization length of strand B for the hydrogel by 15% native PAGE. Strand B was one branch DNA in the hydrogel with the length of 11, 12 and 13 bases hybridized with aptamer linker. Comparing the results with and without AFB<sub>1</sub>, strand B with 13 bases hybridized with aptamer linker was the best.

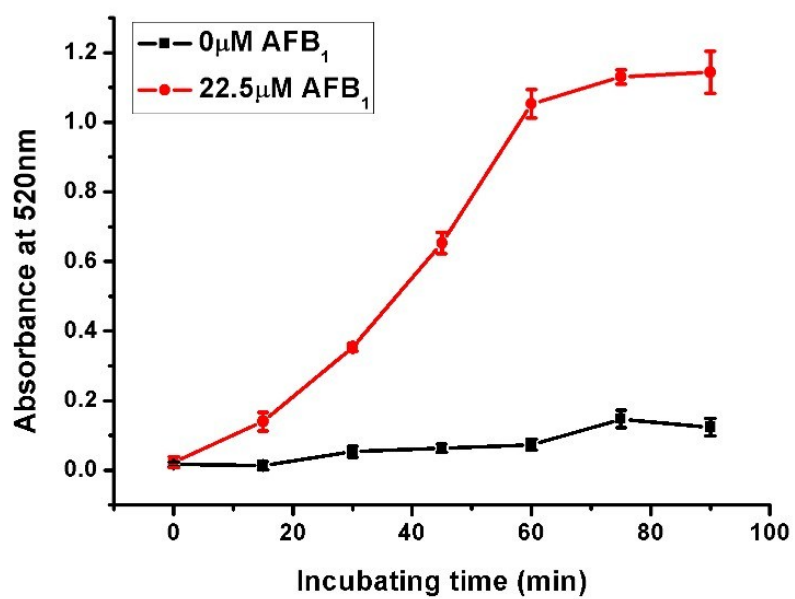

Fig. S4 Kinetics of hydrogel decomposition upon activation by 0  $\mu\text{M}$  and 18  $\mu\text{M}$  AFB<sub>1</sub>.

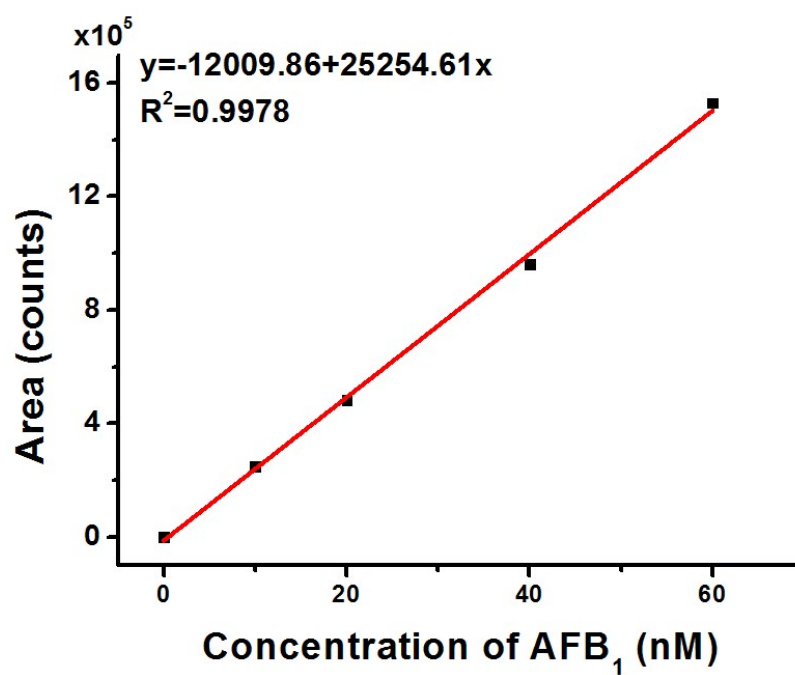

Fig. S5 The standard working curve of LC-MS/MS method.
